# Supplementary figures and images for: Predicting non-linear dynamics by stable local learning in a recurrent spiking neural network
Source: eLife journal article supplement (doi:10.7554/elife.28295), 2017-11-27

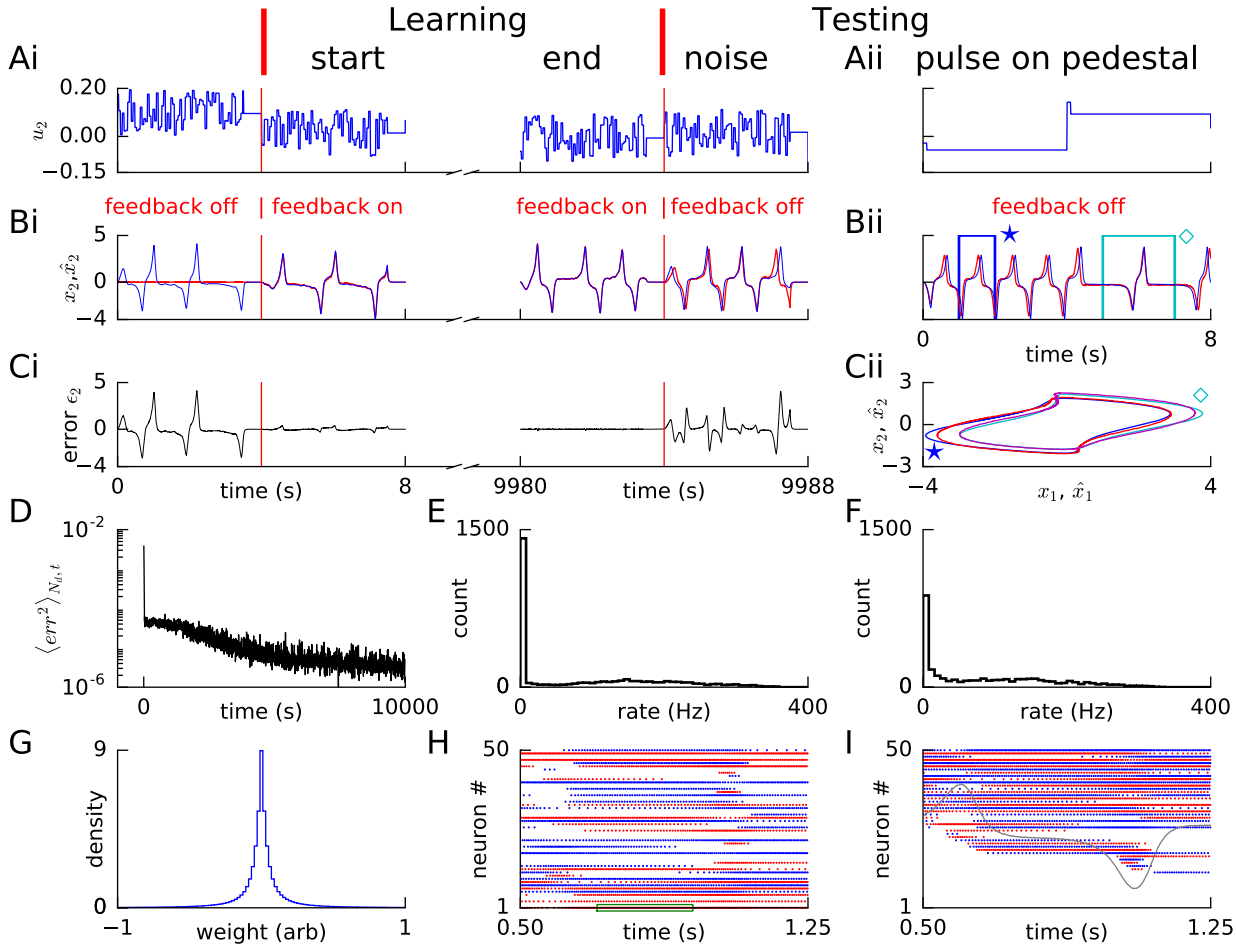

Supplement: supp [file elife-28295-supp-v1.zip]

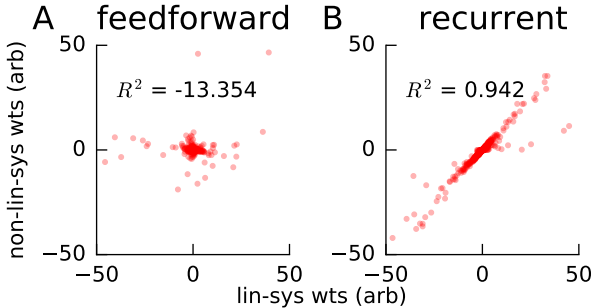

Supplement: supp [file elife-28295-supp-v1.zip]

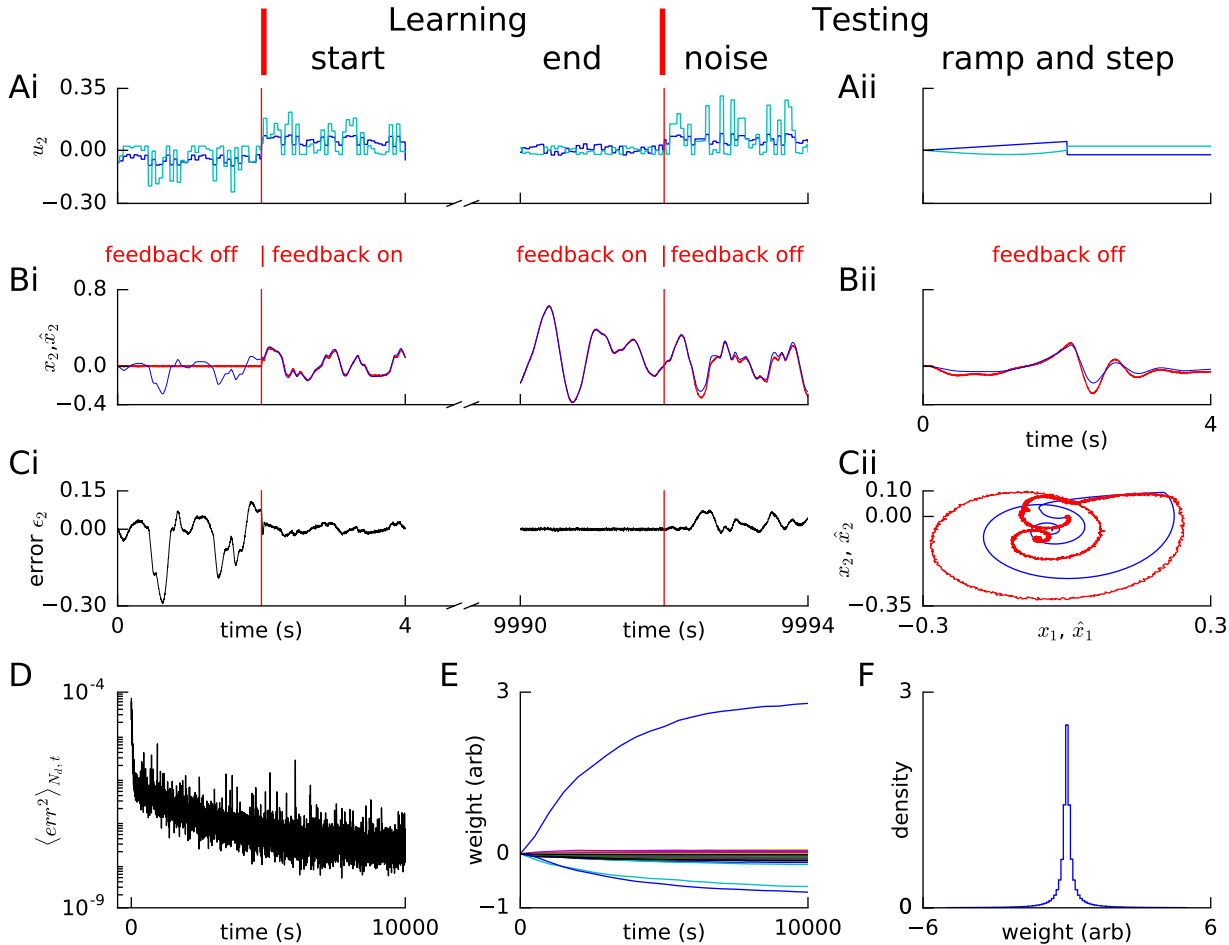

Supplement: supp [file elife-28295-supp-v1.zip]

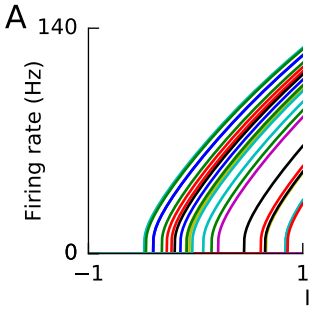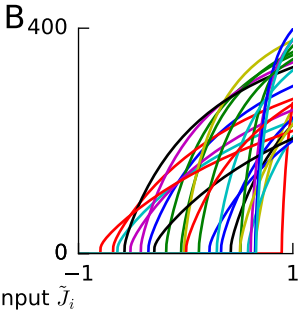

Supplement: supp [file elife-28295-supp-v1.zip]

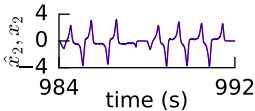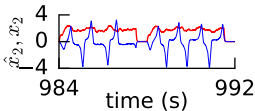

Supplement: supp [file elife-28295-supp-v1.zip]

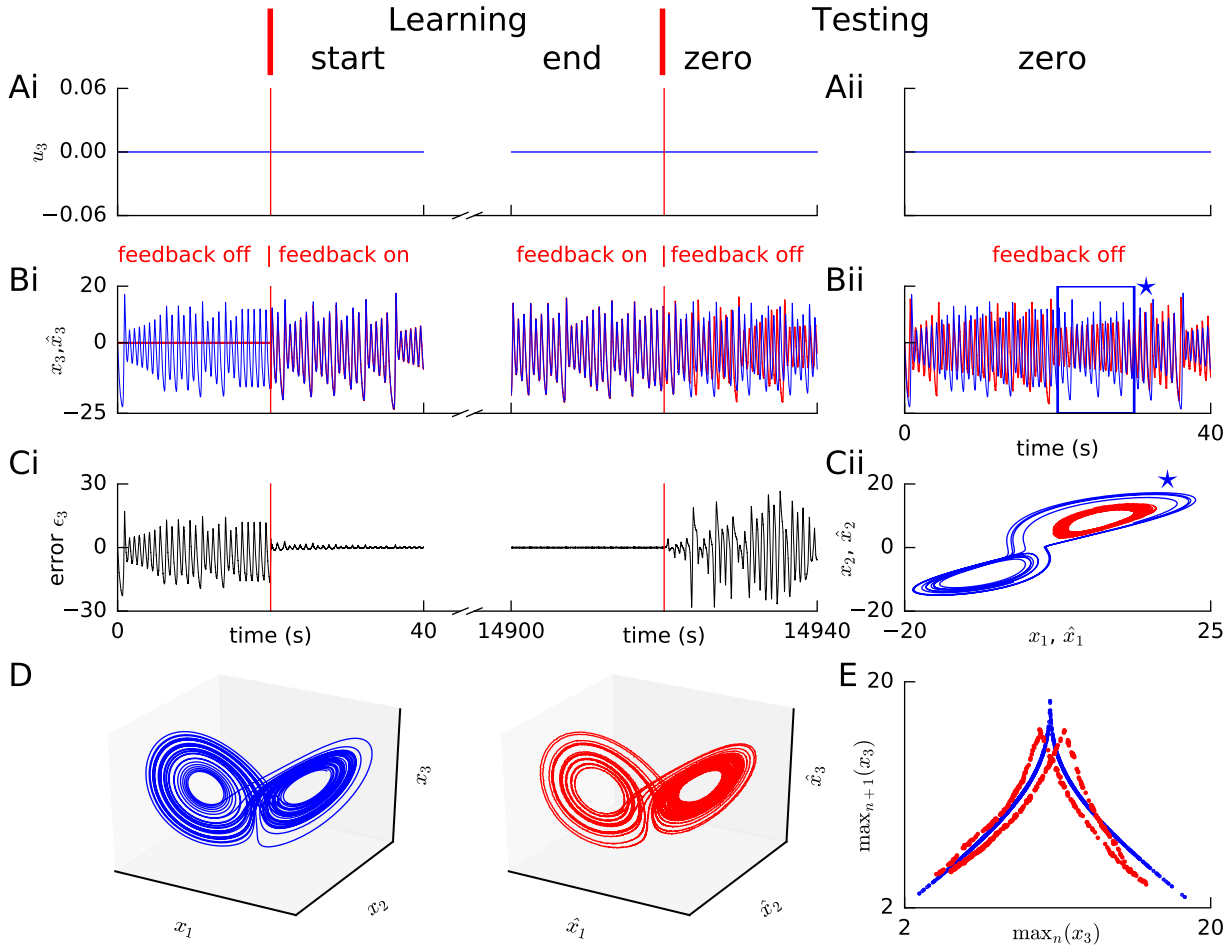

Supplement: supp [file elife-28295-supp-v1.zip]

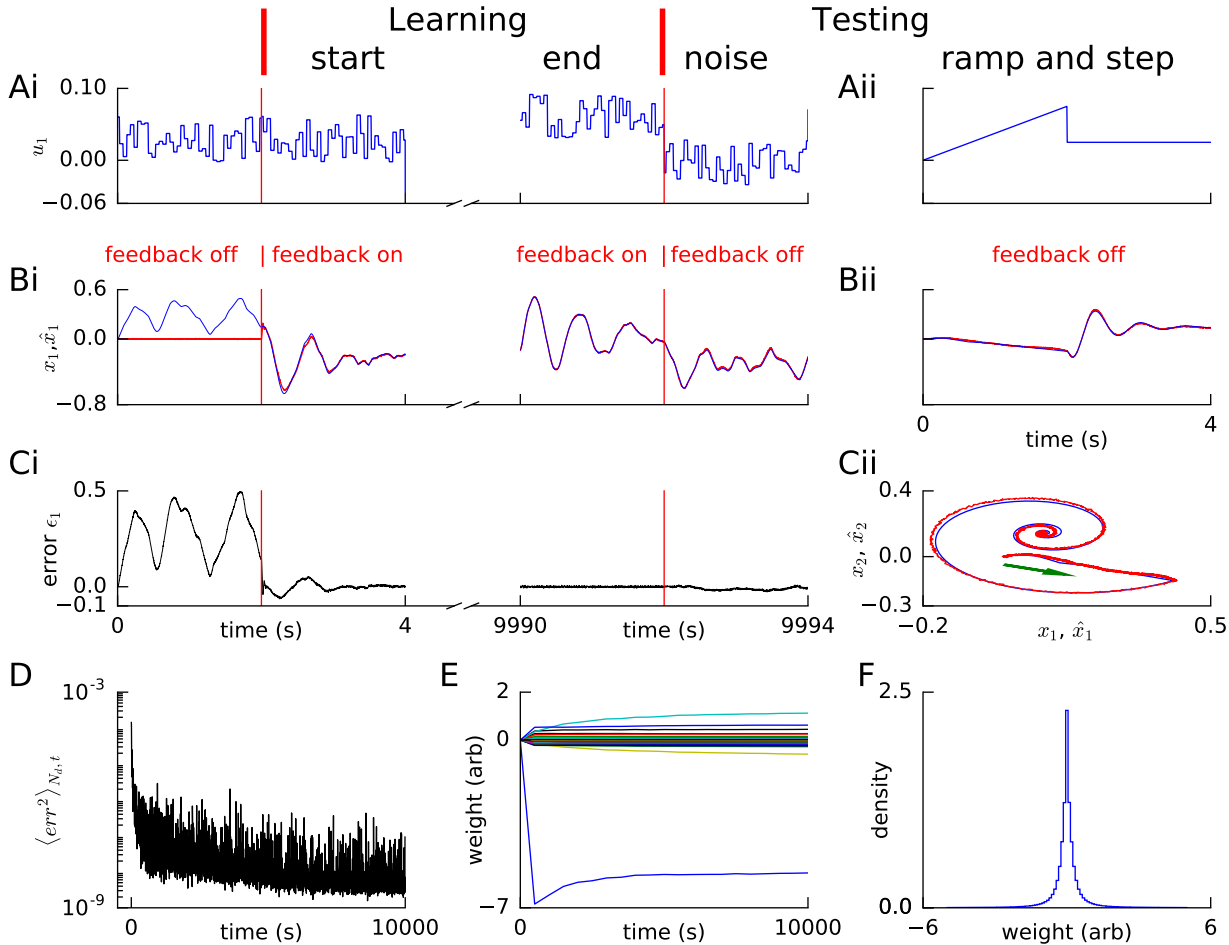

Supplement: supp [file elife-28295-supp-v1.zip]
